# Supplementary material
Source: PubMed Central journal article supplement (PMC3354049)

**a**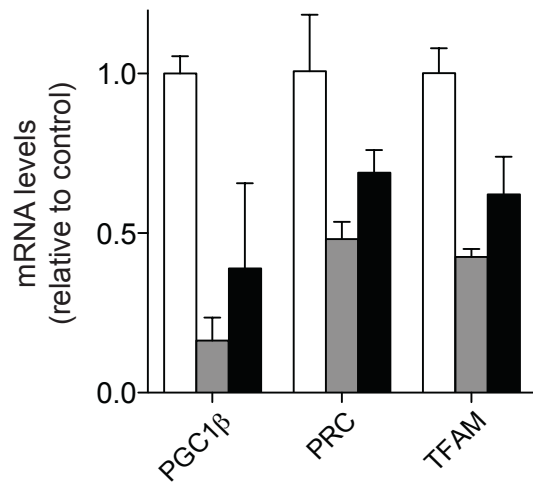**b**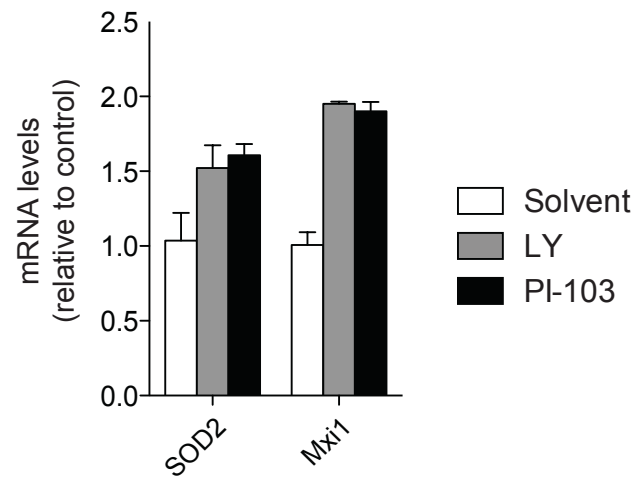

**a**

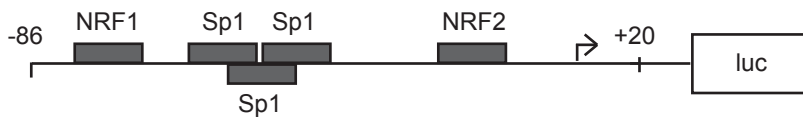

**b**

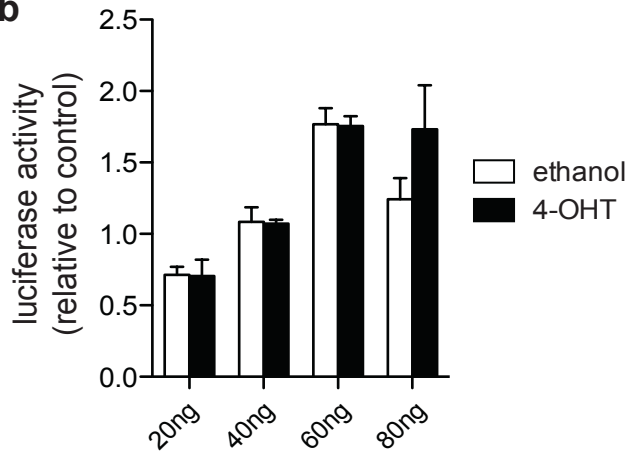

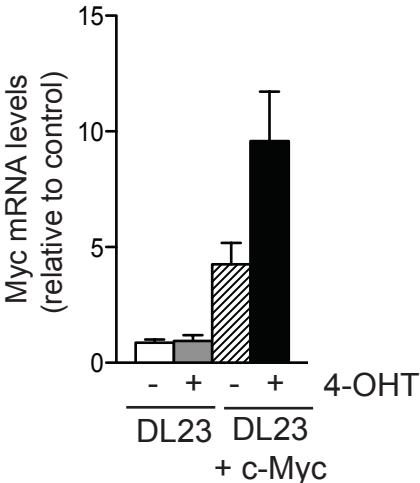

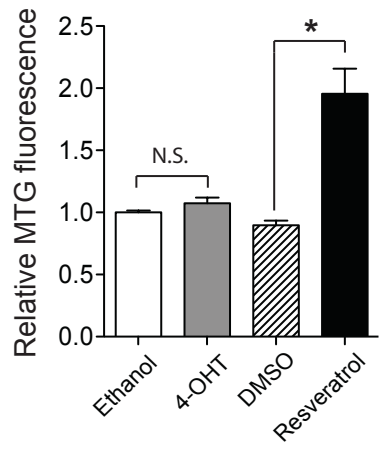

**a**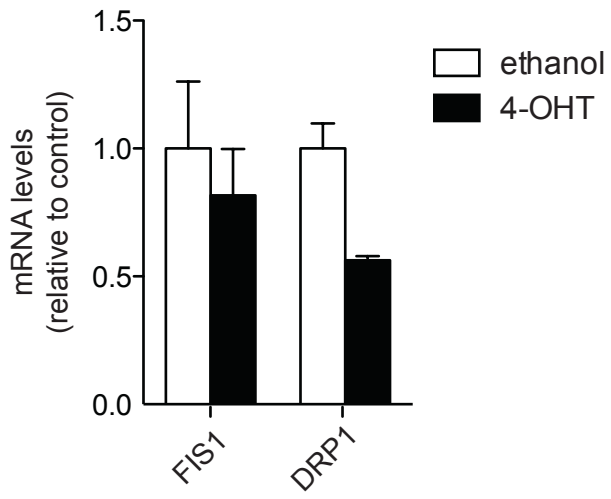**b**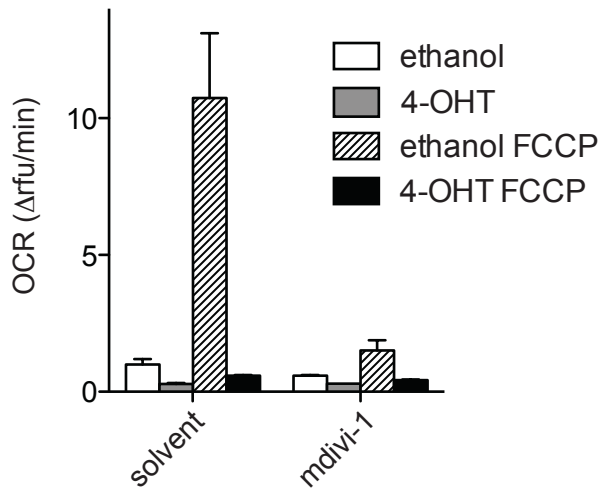

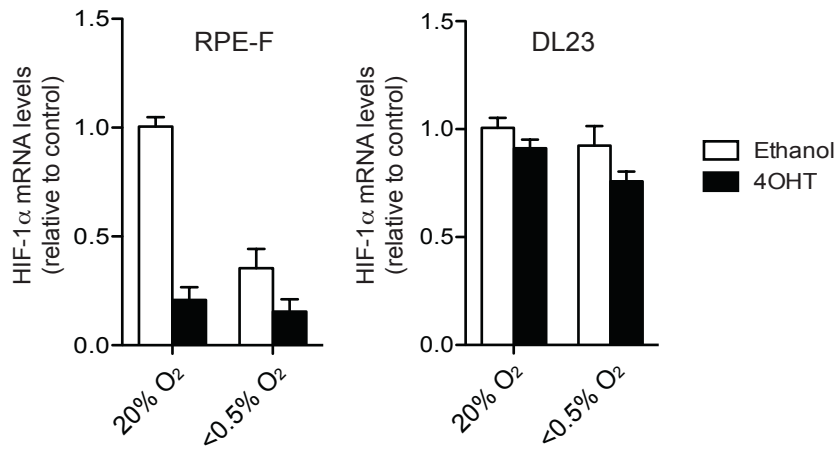

**a**

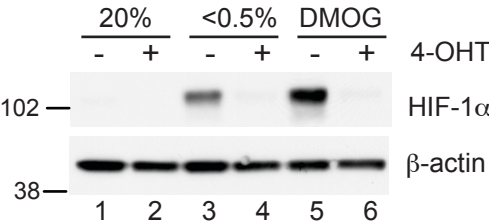

**b**

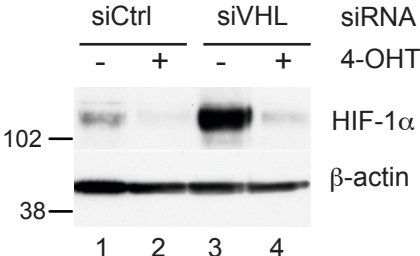

**c**

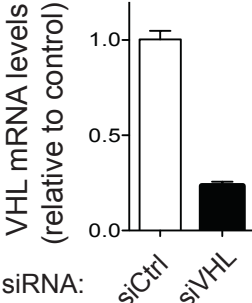

Supplement: cdd2011179x2.pdf [file cdd2011179x2.pdf]
